# Supplementary material for: Independent Association of Postdoctoral Training with Subsequent Careers in Cancer Prevention
Source: PubMed Central journal article supplement (PMC4682206; doi:10.1371/journal.pone.0144880), 2015-12-14
Supplement: pone.0144880.s001.pdf [file pone.0144880.s001.pdf]

**Supplemental Material – Full survey sent to CFPF alumni** (some program-specific questions were modified for unsuccessful applicants and NRSA/F32 awardees)

**EVALUATION OF THE NATIONAL CANCER INSTITUTE'S  
CANCER PREVENTION FELLOWSHIP PROGRAM  
SURVEY OF ALUMNI**

The National Cancer Institute (NCI) has contracted with Westat, an independent research firm located in Rockville, Maryland, to conduct a comprehensive evaluation of the NCI's Cancer Prevention Fellowship Program (CPFP). The purpose of the evaluation is to collect information on the careers and experiences of former fellows, and to get suggestions for improving the program.

Participation in the survey is voluntary and the information you provide will be kept private to the extent permitted by law. The survey data will be collected by Westat, and your individual responses to the survey, or any potentially personal identifying information, will not be shared with NCI staff members. The information collected will be published in aggregate form only and will not identify individuals in any reports or presentations. Your participation will help provide valuable information that will assist CPFP in making decisions about future program initiatives to improve postdoctoral training.

We anticipate the survey will take approximately 25 minutes to complete.

If you have any questions or comments, please contact Kimberley Raue at Westat at (800) 937-8281, ext. 3865 or [CPFPsurvey@westat.com](mailto:CPFPsurvey@westat.com).

OMB No: 0925-XXXX  
Expiration Date: xx/xx/20xx

Collection of this information is authorized by The Public Health Service Act, Section 411 (42 USC 285a). Rights of study participants are protected by The Privacy Act of 1974. Participation is voluntary, and there are no penalties for not participating or withdrawing from the study at any time. Refusal to participate will not affect your benefits in any way. The information collected in this study will be kept private to the extent provided by law. Names and other identifiers will not appear in any report of the study. Information provided will be combined for all study participants and reported as summaries. You are being contacted by email to complete this instrument so that we can evaluate the Cancer Prevention Fellowship Program.

Public reporting burden for this collection of information is estimated to average 25 minutes per response, including the time for reviewing instructions, searching existing data sources, gathering and maintaining the data needed, and completing and reviewing the collection of information. **An agency may not conduct or sponsor, and a person is not required to respond to, a collection of information unless it displays a currently valid OMB control number.** Send comments regarding this burden estimate or any other aspect of this collection of information, including suggestions for reducing this burden, to NIH, Project Clearance Branch, 6705 Rockledge Drive, MSC 7974, Bethesda, MD 20892-7974, ATTN: PRA (0925-XXXX). Do not return the completed form to this address.

## EMPLOYMENT INFORMATION

The first section of the survey asks questions about your work history and the type of work you are currently doing.

1. For the following question, please include your participation in the Cancer Prevention Fellowship Program. Which statement represents your postdoctoral or fellowship experience? *(Please select one answer.)*

Completed **one** postdoctoral or fellowship program or position ..... <sup>1</sup>  
Completed **multiple** postdoctoral or fellowship programs or positions ..... <sup>2</sup>

2. In what year did you complete your most recent postdoctoral or fellowship position?

3. Do you **currently** hold a postdoctoral or fellowship position?

Yes ..... <sup>1</sup>  
No ..... <sup>2</sup>

4. Including self-employment, what is your **current** employment status? *(Please select one answer.)*

Employed full-time ..... <sup>1</sup>  
Employed part-time ..... <sup>2</sup>  
Retired ..... <sup>3</sup> *(Go to question 16.)*  
Not currently employed ..... <sup>4</sup> *(Go to question 16.)*

5. Which **one** of the following best describes your **primary** employer? *(Please select one answer.)*

National Cancer Institute (NCI) ..... <sup>1</sup> *(Go to question 8.)*  
National Institutes of Health (NIH) other than NCI ..... <sup>2</sup> *(Go to question 8.)*  
Government agency other than NIH ..... <sup>3</sup> *(Go to question 7.)*  
University or some other academic institution ..... <sup>4</sup> *(Go to question 6.)*  
Independent cancer research center or some other health research institution ..... <sup>5</sup> *(Go to question 7.)*  
Health care clinic or hospital ..... <sup>6</sup> *(Go to question 7.)*  
A foundation or professional association ..... <sup>7</sup> *(Go to question 7.)*  
Private company ..... <sup>8</sup> *(Go to question 7.)*  
Self-employed ..... <sup>9</sup> *(Go to question 8.)*

6. What is your tenure status? *(Please select one answer.)*

Tenured ..... <sup>1</sup>  
On the tenure track ..... <sup>2</sup>  
Not on the tenure track ..... <sup>3</sup>

7. What is the name of your primary employer?

\_\_\_\_\_

8. How long have you been at your **current** job?

year(s)  month(s)

9. In what discipline(s) does your current work primarily fall? (*Please select all that apply.*)

- Behavioral or social sciences ..... <sup>1</sup>
  - Biological or biomedical sciences..... <sup>2</sup>
  - Epidemiology and/or public health ..... <sup>3</sup>
  - Mathematical sciences ..... <sup>4</sup>
  - Medicine..... <sup>5</sup>
  - Nutrition sciences..... <sup>6</sup>
  - Physical sciences..... <sup>7</sup>
  - Other (*Please specify.*) ..... <sup>8</sup>
- 

10. For this question, please exclude time spent on cancer treatment or cancer treatment research.

**Approximately** what percentage of your current work is done **in cancer prevention and control**? (*Please select one answer.*)

- None ..... <sup>1</sup> (*Go to question 11.*)
- A small percentage (1%–25%)..... <sup>2</sup> (*Go to question 12.*)
- A moderate percentage (26%–50%) ..... <sup>3</sup> (*Go to question 12.*)
- A large percentage (51%–75%) ..... <sup>4</sup> (*Go to question 12.*)
- A very large percentage (76%–100%) ..... <sup>5</sup> (*Go to question 12.*)

11. What are the reasons you are **not** currently working in the field of cancer prevention or control? (*Please select all that apply and then go to question 13.*)

- A suitable job in the field was not available ..... <sup>1</sup>
  - A better opportunity outside of the field was available..... <sup>2</sup>
  - My career or professional interests changed ..... <sup>3</sup>
  - Personal reasons ..... <sup>4</sup>
  - Other (*Please specify.*) ..... <sup>5</sup>
- 

12. **Approximately** what percentage of your time in your current job is spent on **research and research support activities in cancer prevention and control**? Please include time spent conducting research yourself, as well as time spent supporting the research of others through activities such as research management, monitoring, reviewing, funding, analysis, dissemination, and other research support activities. (*Please select one answer.*)

- None ..... <sup>1</sup>
- A small percentage (1%–25%)..... <sup>2</sup>
- A moderate percentage (26%–50%) ..... <sup>3</sup>
- A large percentage (51%–75%) ..... <sup>4</sup>
- A very large percentage (76%–100%) ..... <sup>5</sup>

13. **Approximately** what percentage of your time in your current job is spent on **all research and research support activities, not just those in cancer prevention and control**? Please include time spent conducting research yourself, as well as time spent supporting the research of others through activities such as research management, monitoring, reviewing, funding, analysis, dissemination, and other research support activities. *(Please select one answer.)*

- None ..... <sup>1</sup>
- A small percentage (1%–25%)..... <sup>2</sup>
- A moderate percentage (26%–50%) ..... <sup>3</sup>
- A large percentage (51%–75%) ..... <sup>4</sup>
- A very large percentage (76%–100%) ..... <sup>5</sup>

14. **Approximately** what percentage of your time in your current job is spent on teaching and advising students? *(Please select one answer.)*

- None ..... <sup>1</sup>
- A small percentage (1%–25%)..... <sup>2</sup>
- A moderate percentage (26%–50%) ..... <sup>3</sup>
- A large percentage (51%–75%) ..... <sup>4</sup>
- A very large percentage (76%–100%) ..... <sup>5</sup>

15. **Multidisciplinary** activities are activities that involve several academic disciplines or professional specializations. To what extent do you currently engage in the following collaborative and multidisciplinary activities with other professionals? *(Please select one answer in each row.)*

| Professional activity                                                       | Not at all                            | A small extent                        | A moderate extent                     | A large extent                        | A very large extent                   |
|-----------------------------------------------------------------------------|---------------------------------------|---------------------------------------|---------------------------------------|---------------------------------------|---------------------------------------|
| a. Incorporate research from multiple fields/disciplines in your work ..... | <input type="checkbox"/> <sup>1</sup> | <input type="checkbox"/> <sup>2</sup> | <input type="checkbox"/> <sup>3</sup> | <input type="checkbox"/> <sup>4</sup> | <input type="checkbox"/> <sup>5</sup> |
| b. Collaborate with professionals from multiple disciplines.....            | <input type="checkbox"/> <sup>1</sup> | <input type="checkbox"/> <sup>2</sup> | <input type="checkbox"/> <sup>3</sup> | <input type="checkbox"/> <sup>4</sup> | <input type="checkbox"/> <sup>5</sup> |
| c. Manage and/or lead professionals from multiple disciplines.....          | <input type="checkbox"/> <sup>1</sup> | <input type="checkbox"/> <sup>2</sup> | <input type="checkbox"/> <sup>3</sup> | <input type="checkbox"/> <sup>4</sup> | <input type="checkbox"/> <sup>5</sup> |
| d. Present at multidisciplinary conferences or meetings .....               | <input type="checkbox"/> <sup>1</sup> | <input type="checkbox"/> <sup>2</sup> | <input type="checkbox"/> <sup>3</sup> | <input type="checkbox"/> <sup>4</sup> | <input type="checkbox"/> <sup>5</sup> |
| e. Publish in multidisciplinary journals or publications.....               | <input type="checkbox"/> <sup>1</sup> | <input type="checkbox"/> <sup>2</sup> | <input type="checkbox"/> <sup>3</sup> | <input type="checkbox"/> <sup>4</sup> | <input type="checkbox"/> <sup>5</sup> |
| f. Publish with professionals from multiple disciplines .....               | <input type="checkbox"/> <sup>1</sup> | <input type="checkbox"/> <sup>2</sup> | <input type="checkbox"/> <sup>3</sup> | <input type="checkbox"/> <sup>4</sup> | <input type="checkbox"/> <sup>5</sup> |

## CAREER ACTIVITIES

This section asks more detailed information about the types of activities you engage in as part of your work.

16. To what extent have you had a role in the following professional activities **during your career?** (*Please select one answer in each row.*)

| Professional activity                                                                                     | Not at all                            | A small extent                        | A moderate extent                     | A large extent                        | A very large extent                   | Not applicable                        |
|-----------------------------------------------------------------------------------------------------------|---------------------------------------|---------------------------------------|---------------------------------------|---------------------------------------|---------------------------------------|---------------------------------------|
| a. Pursued a new theoretical direction or addressed a topic previously unexplored in cancer research..... | <input type="checkbox"/> <sup>1</sup> | <input type="checkbox"/> <sup>2</sup> | <input type="checkbox"/> <sup>3</sup> | <input type="checkbox"/> <sup>4</sup> | <input type="checkbox"/> <sup>5</sup> | <input type="checkbox"/> <sup>6</sup> |
| b. Made a significant contribution to a scientific breakthrough in cancer research .....                  | <input type="checkbox"/> <sup>1</sup> | <input type="checkbox"/> <sup>2</sup> | <input type="checkbox"/> <sup>3</sup> | <input type="checkbox"/> <sup>4</sup> | <input type="checkbox"/> <sup>5</sup> | <input type="checkbox"/> <sup>6</sup> |
| c. Made a significant contribution to advancing innovative ideas in cancer research .....                 | <input type="checkbox"/> <sup>1</sup> | <input type="checkbox"/> <sup>2</sup> | <input type="checkbox"/> <sup>3</sup> | <input type="checkbox"/> <sup>4</sup> | <input type="checkbox"/> <sup>5</sup> | <input type="checkbox"/> <sup>6</sup> |
| d. Addressed key knowledge gaps in cancer research .....                                                  | <input type="checkbox"/> <sup>1</sup> | <input type="checkbox"/> <sup>2</sup> | <input type="checkbox"/> <sup>3</sup> | <input type="checkbox"/> <sup>4</sup> | <input type="checkbox"/> <sup>5</sup> | <input type="checkbox"/> <sup>6</sup> |
| e. Developed funding initiatives to address knowledge gaps in cancer research .....                       | <input type="checkbox"/> <sup>1</sup> | <input type="checkbox"/> <sup>2</sup> | <input type="checkbox"/> <sup>3</sup> | <input type="checkbox"/> <sup>4</sup> | <input type="checkbox"/> <sup>5</sup> | <input type="checkbox"/> <sup>6</sup> |

17. For this question, please answer only for activities that occurred after completing your doctoral degree and postdoctoral work, if applicable. **During the past five years,** how many times have you engaged in the following publication activities? (*Please select one answer on each row.*)

| Publication activity                                                         | None                                  | Once                                  | Two or three times                    | Four or five times                    | Six or more times                     |
|------------------------------------------------------------------------------|---------------------------------------|---------------------------------------|---------------------------------------|---------------------------------------|---------------------------------------|
| a. Authored or co-authored a paper in a published peer-reviewed journal..... | <input type="checkbox"/> <sup>1</sup> | <input type="checkbox"/> <sup>2</sup> | <input type="checkbox"/> <sup>3</sup> | <input type="checkbox"/> <sup>4</sup> | <input type="checkbox"/> <sup>5</sup> |
| b. Authored or co-authored a chapter in a published book.....                | <input type="checkbox"/> <sup>1</sup> | <input type="checkbox"/> <sup>2</sup> | <input type="checkbox"/> <sup>3</sup> | <input type="checkbox"/> <sup>4</sup> | <input type="checkbox"/> <sup>5</sup> |
| c. Authored or co-authored a published book ....                             | <input type="checkbox"/> <sup>1</sup> | <input type="checkbox"/> <sup>2</sup> | <input type="checkbox"/> <sup>3</sup> | <input type="checkbox"/> <sup>4</sup> | <input type="checkbox"/> <sup>5</sup> |
| d. Authored or co-authored a technical report or white paper .....           | <input type="checkbox"/> <sup>1</sup> | <input type="checkbox"/> <sup>2</sup> | <input type="checkbox"/> <sup>3</sup> | <input type="checkbox"/> <sup>4</sup> | <input type="checkbox"/> <sup>5</sup> |

18. For this question, please answer only for activities that occurred after completing your doctoral degree and postdoctoral work and exclude presentations given by your students, if applicable. **During the past five years**, how many times have you personally engaged in the following presentation activities? *(Please select one answer on each row.)*

| Presentation activity                                                                       | None                                  | Once                                  | Two or three times                    | Four or five times                    | Six or more times                     |
|---------------------------------------------------------------------------------------------|---------------------------------------|---------------------------------------|---------------------------------------|---------------------------------------|---------------------------------------|
| a. Presented at a professional conference or scientific meeting .....                       | <input type="checkbox"/> <sup>1</sup> | <input type="checkbox"/> <sup>2</sup> | <input type="checkbox"/> <sup>3</sup> | <input type="checkbox"/> <sup>4</sup> | <input type="checkbox"/> <sup>5</sup> |
| b. Chaired a session or workshop at a professional conference or scientific meeting .....   | <input type="checkbox"/> <sup>1</sup> | <input type="checkbox"/> <sup>2</sup> | <input type="checkbox"/> <sup>3</sup> | <input type="checkbox"/> <sup>4</sup> | <input type="checkbox"/> <sup>5</sup> |
| c. Organized a session or workshop at a professional conference or scientific meeting ..... | <input type="checkbox"/> <sup>1</sup> | <input type="checkbox"/> <sup>2</sup> | <input type="checkbox"/> <sup>3</sup> | <input type="checkbox"/> <sup>4</sup> | <input type="checkbox"/> <sup>5</sup> |
| d. Organized a professional conference or scientific meeting.....                           | <input type="checkbox"/> <sup>1</sup> | <input type="checkbox"/> <sup>2</sup> | <input type="checkbox"/> <sup>3</sup> | <input type="checkbox"/> <sup>4</sup> | <input type="checkbox"/> <sup>5</sup> |

19. For this question, please answer only for activities that occurred after completing your doctoral degree and postdoctoral work, if applicable. **During the past five years**, how many times have you engaged in the following community service activities? *(Please select one answer on each row.)*

| Community service activity                                                      | None                                  | Once                                  | Two or three times                    | Four or five times                    | Six or more times                     |
|---------------------------------------------------------------------------------|---------------------------------------|---------------------------------------|---------------------------------------|---------------------------------------|---------------------------------------|
| a. Advised or presented information to a patient advocacy or support group..... | <input type="checkbox"/> <sup>1</sup> | <input type="checkbox"/> <sup>2</sup> | <input type="checkbox"/> <sup>3</sup> | <input type="checkbox"/> <sup>4</sup> | <input type="checkbox"/> <sup>5</sup> |
| b. Translated cancer research information for a lay audience .....              | <input type="checkbox"/> <sup>1</sup> | <input type="checkbox"/> <sup>2</sup> | <input type="checkbox"/> <sup>3</sup> | <input type="checkbox"/> <sup>4</sup> | <input type="checkbox"/> <sup>5</sup> |
| c. Served on a local health advisory board, panel, or committee .....           | <input type="checkbox"/> <sup>1</sup> | <input type="checkbox"/> <sup>2</sup> | <input type="checkbox"/> <sup>3</sup> | <input type="checkbox"/> <sup>4</sup> | <input type="checkbox"/> <sup>5</sup> |
| d. Served on a national health advisory board, panel, or committee .....        | <input type="checkbox"/> <sup>1</sup> | <input type="checkbox"/> <sup>2</sup> | <input type="checkbox"/> <sup>3</sup> | <input type="checkbox"/> <sup>4</sup> | <input type="checkbox"/> <sup>5</sup> |

20. For this question, please answer only for activities that occurred after completing your doctoral degree and postdoctoral work, if applicable. During **the past five years**, how many times have you engaged in the following other professional activities? (*Please select one answer on each row.*)

| Other professional activity                                                   | None                                  | Once                                  | Two or three times                    | Four or five times                    | Six or more times                     |
|-------------------------------------------------------------------------------|---------------------------------------|---------------------------------------|---------------------------------------|---------------------------------------|---------------------------------------|
| a. Established or appointed to a working group on cancer research .....       | <input type="checkbox"/> <sup>1</sup> | <input type="checkbox"/> <sup>2</sup> | <input type="checkbox"/> <sup>3</sup> | <input type="checkbox"/> <sup>4</sup> | <input type="checkbox"/> <sup>5</sup> |
| b. Served as a reviewer for a journal .....                                   | <input type="checkbox"/> <sup>1</sup> | <input type="checkbox"/> <sup>2</sup> | <input type="checkbox"/> <sup>3</sup> | <input type="checkbox"/> <sup>4</sup> | <input type="checkbox"/> <sup>5</sup> |
| c. Served as an editor of a journal or served on a journal review board ..... | <input type="checkbox"/> <sup>1</sup> | <input type="checkbox"/> <sup>2</sup> | <input type="checkbox"/> <sup>3</sup> | <input type="checkbox"/> <sup>4</sup> | <input type="checkbox"/> <sup>5</sup> |
| d. Led or co-led a clinical trial.....                                        | <input type="checkbox"/> <sup>1</sup> | <input type="checkbox"/> <sup>2</sup> | <input type="checkbox"/> <sup>3</sup> | <input type="checkbox"/> <sup>4</sup> | <input type="checkbox"/> <sup>5</sup> |
| e. Received a competitive grant, contract, or subcontract for your work.....  | <input type="checkbox"/> <sup>1</sup> | <input type="checkbox"/> <sup>2</sup> | <input type="checkbox"/> <sup>3</sup> | <input type="checkbox"/> <sup>4</sup> | <input type="checkbox"/> <sup>5</sup> |
| f. Filed or received a patent .....                                           | <input type="checkbox"/> <sup>1</sup> | <input type="checkbox"/> <sup>2</sup> | <input type="checkbox"/> <sup>3</sup> | <input type="checkbox"/> <sup>4</sup> | <input type="checkbox"/> <sup>5</sup> |
| g. Developed a prototype, technology, or marketable product .....             | <input type="checkbox"/> <sup>1</sup> | <input type="checkbox"/> <sup>2</sup> | <input type="checkbox"/> <sup>3</sup> | <input type="checkbox"/> <sup>4</sup> | <input type="checkbox"/> <sup>5</sup> |
| h. Other professional activity ( <i>Please specify.</i> )...                  | <input type="checkbox"/> <sup>1</sup> | <input type="checkbox"/> <sup>2</sup> | <input type="checkbox"/> <sup>3</sup> | <input type="checkbox"/> <sup>4</sup> | <input type="checkbox"/> <sup>5</sup> |

21. What is your current annual salary, including any bonuses you have received? (*Please select one answer.*)

- Less than \$50,000 ..... <sup>1</sup>
- \$50,000–\$74,999..... <sup>2</sup>
- \$75,000–\$99,999..... <sup>3</sup>
- \$100,000–\$124,999..... <sup>4</sup>
- \$125,000–\$149,999..... <sup>5</sup>
- \$150,000–\$174,999..... <sup>6</sup>
- \$175,000–\$199,999..... <sup>7</sup>
- \$200,000–\$224,999..... <sup>8</sup>
- \$225,000 or more ..... <sup>9</sup>
- Not applicable ..... <sup>10</sup>

22. Do you feel that your salary is generally competitive with others in similar positions?

- Yes..... <sup>1</sup>
- No ..... <sup>2</sup>
- Not applicable..... <sup>3</sup>

23. Have the following occurred in your career since completing your doctoral degree and postdoctoral work, if applicable? (Please select one answer on each row.)

|                                                                              | Yes                                   | No                                    |
|------------------------------------------------------------------------------|---------------------------------------|---------------------------------------|
| Advanced to a more senior-level position.....                                | <input type="checkbox"/> <sup>1</sup> | <input type="checkbox"/> <sup>2</sup> |
| Assumed a role as a project leader (e.g., technical group leader).....       | <input type="checkbox"/> <sup>1</sup> | <input type="checkbox"/> <sup>2</sup> |
| Assumed leadership or management responsibilities (e.g., section chief)..... | <input type="checkbox"/> <sup>1</sup> | <input type="checkbox"/> <sup>2</sup> |
| Served as a mentor to others in your organization.....                       | <input type="checkbox"/> <sup>1</sup> | <input type="checkbox"/> <sup>2</sup> |
| Assumed other leadership roles (e.g., led a committee) .....                 | <input type="checkbox"/> <sup>1</sup> | <input type="checkbox"/> <sup>2</sup> |

24. How satisfied are you with the progression of your career to this point? (Please select one answer.)

|                          |                                       |
|--------------------------|---------------------------------------|
| Not at all.....          | <input type="checkbox"/> <sup>1</sup> |
| A little satisfied ..... | <input type="checkbox"/> <sup>2</sup> |
| Somewhat satisfied.....  | <input type="checkbox"/> <sup>3</sup> |
| Very satisfied .....     | <input type="checkbox"/> <sup>4</sup> |
| Extremely satisfied..... | <input type="checkbox"/> <sup>5</sup> |

## PROFESSIONAL ASSOCIATIONS AND AWARDS

**This section asks about your participation in professional associations and awards you may have received for your work.**

25. How many professional associations (e.g., American Association for Cancer Research, American Medical Association) are you **currently** a member of? (Please select one answer.)

|                   |                                       |
|-------------------|---------------------------------------|
| None.....         | <input type="checkbox"/> <sup>1</sup> |
| One .....         | <input type="checkbox"/> <sup>2</sup> |
| Two .....         | <input type="checkbox"/> <sup>3</sup> |
| Three .....       | <input type="checkbox"/> <sup>4</sup> |
| Four or more..... | <input type="checkbox"/> <sup>5</sup> |

26. For this question, please answer only for activities that occurred after completing your doctoral degree and postdoctoral work, if applicable. **During the past five years**, have you held either a volunteer or elected leadership position in a professional association? (Please select one answer on each row.)

|                                       | Yes                                   | No                                    |
|---------------------------------------|---------------------------------------|---------------------------------------|
| A volunteer leadership position ..... | <input type="checkbox"/> <sup>1</sup> | <input type="checkbox"/> <sup>2</sup> |
| An elected leadership position .....  | <input type="checkbox"/> <sup>1</sup> | <input type="checkbox"/> <sup>2</sup> |



27. For this question, please answer only for activities that occurred after completing your doctoral degree and postdoctoral work, if applicable. **During the past five years**, have you received a professional award related to your work?

Yes (*Please specify.*)..... <sup>1</sup>  
 No ..... <sup>2</sup>

**PROGRAM BENEFITS**

**This section asks questions about benefits you received from participating in the Cancer Prevention Fellowship Program.**

28. **While a fellow**, how beneficial was the Cancer Prevention Fellowship Program to your knowledge, skills, and research in the following areas? (*Please select one answer on each row.*)

| Area                                                                    | Not at all beneficial                 | A little beneficial                   | Somewhat beneficial                   | Very beneficial                       | Extremely beneficial                  |
|-------------------------------------------------------------------------|---------------------------------------|---------------------------------------|---------------------------------------|---------------------------------------|---------------------------------------|
| a. Scientific subject matter knowledge/expertise.....                   | <input type="checkbox"/> <sup>1</sup> | <input type="checkbox"/> <sup>2</sup> | <input type="checkbox"/> <sup>3</sup> | <input type="checkbox"/> <sup>4</sup> | <input type="checkbox"/> <sup>5</sup> |
| b. Knowledge/expertise in public health ...                             | <input type="checkbox"/> <sup>1</sup> | <input type="checkbox"/> <sup>2</sup> | <input type="checkbox"/> <sup>3</sup> | <input type="checkbox"/> <sup>4</sup> | <input type="checkbox"/> <sup>5</sup> |
| c. Research skills and/or techniques.....                               | <input type="checkbox"/> <sup>1</sup> | <input type="checkbox"/> <sup>2</sup> | <input type="checkbox"/> <sup>3</sup> | <input type="checkbox"/> <sup>4</sup> | <input type="checkbox"/> <sup>5</sup> |
| d. Experience using specialized equipment and/or technology .....       | <input type="checkbox"/> <sup>1</sup> | <input type="checkbox"/> <sup>2</sup> | <input type="checkbox"/> <sup>3</sup> | <input type="checkbox"/> <sup>4</sup> | <input type="checkbox"/> <sup>5</sup> |
| e. Confidence in performing research .....                              | <input type="checkbox"/> <sup>1</sup> | <input type="checkbox"/> <sup>2</sup> | <input type="checkbox"/> <sup>3</sup> | <input type="checkbox"/> <sup>4</sup> | <input type="checkbox"/> <sup>5</sup> |
| f. The overall quality of your research.....                            | <input type="checkbox"/> <sup>1</sup> | <input type="checkbox"/> <sup>2</sup> | <input type="checkbox"/> <sup>3</sup> | <input type="checkbox"/> <sup>4</sup> | <input type="checkbox"/> <sup>5</sup> |
| g. The specific direction of your research ..                           | <input type="checkbox"/> <sup>1</sup> | <input type="checkbox"/> <sup>2</sup> | <input type="checkbox"/> <sup>3</sup> | <input type="checkbox"/> <sup>4</sup> | <input type="checkbox"/> <sup>5</sup> |
| h. The progress of your research .....                                  | <input type="checkbox"/> <sup>1</sup> | <input type="checkbox"/> <sup>2</sup> | <input type="checkbox"/> <sup>3</sup> | <input type="checkbox"/> <sup>4</sup> | <input type="checkbox"/> <sup>5</sup> |
| i. Your ability to conduct independent research .....                   | <input type="checkbox"/> <sup>1</sup> | <input type="checkbox"/> <sup>2</sup> | <input type="checkbox"/> <sup>3</sup> | <input type="checkbox"/> <sup>4</sup> | <input type="checkbox"/> <sup>5</sup> |
| j. Contacts who advised or collaborated with you on your research ..... | <input type="checkbox"/> <sup>1</sup> | <input type="checkbox"/> <sup>2</sup> | <input type="checkbox"/> <sup>3</sup> | <input type="checkbox"/> <sup>4</sup> | <input type="checkbox"/> <sup>5</sup> |

29. **While a fellow**, how beneficial was the Cancer Prevention Fellowship Program in the following areas pertaining to other professional-related knowledge and skills? (*Please select one answer on each row.*)

| Skill                                        | Not at all beneficial                 | A little beneficial                   | Somewhat beneficial                   | Very beneficial                       | Extremely beneficial                  |
|----------------------------------------------|---------------------------------------|---------------------------------------|---------------------------------------|---------------------------------------|---------------------------------------|
| a. Publication skills .....                  | <input type="checkbox"/> <sup>1</sup> | <input type="checkbox"/> <sup>2</sup> | <input type="checkbox"/> <sup>3</sup> | <input type="checkbox"/> <sup>4</sup> | <input type="checkbox"/> <sup>5</sup> |
| b. Presentation skills.....                  | <input type="checkbox"/> <sup>1</sup> | <input type="checkbox"/> <sup>2</sup> | <input type="checkbox"/> <sup>3</sup> | <input type="checkbox"/> <sup>4</sup> | <input type="checkbox"/> <sup>5</sup> |
| c. Grant and/or contract writing skills..... | <input type="checkbox"/> <sup>1</sup> | <input type="checkbox"/> <sup>2</sup> | <input type="checkbox"/> <sup>3</sup> | <input type="checkbox"/> <sup>4</sup> | <input type="checkbox"/> <sup>5</sup> |
| d. Mentoring skills .....                    | <input type="checkbox"/> <sup>1</sup> | <input type="checkbox"/> <sup>2</sup> | <input type="checkbox"/> <sup>3</sup> | <input type="checkbox"/> <sup>4</sup> | <input type="checkbox"/> <sup>5</sup> |
| e. Leadership and/or management skills ....  | <input type="checkbox"/> <sup>1</sup> | <input type="checkbox"/> <sup>2</sup> | <input type="checkbox"/> <sup>3</sup> | <input type="checkbox"/> <sup>4</sup> | <input type="checkbox"/> <sup>5</sup> |

30. How beneficial was the Cancer Prevention Fellowship Program to you in terms of providing the following career-related benefits? *(Please select one answer on each row.)*

| <b>Benefit</b>                                                                            | <b>Not at all beneficial</b>          | <b>A little beneficial</b>            | <b>Somewhat beneficial</b>            | <b>Very beneficial</b>                | <b>Extremely beneficial</b>           | <b>Not applicable</b>                 |
|-------------------------------------------------------------------------------------------|---------------------------------------|---------------------------------------|---------------------------------------|---------------------------------------|---------------------------------------|---------------------------------------|
| a. Securing your first position after the fellowship .....                                | <input type="checkbox"/> <sup>1</sup> | <input type="checkbox"/> <sup>2</sup> | <input type="checkbox"/> <sup>3</sup> | <input type="checkbox"/> <sup>4</sup> | <input type="checkbox"/> <sup>5</sup> | <input type="checkbox"/> <sup>6</sup> |
| b. Securing subsequent positions following your first position after the fellowship ..... | <input type="checkbox"/> <sup>1</sup> | <input type="checkbox"/> <sup>2</sup> | <input type="checkbox"/> <sup>3</sup> | <input type="checkbox"/> <sup>4</sup> | <input type="checkbox"/> <sup>5</sup> | <input type="checkbox"/> <sup>6</sup> |
| c. Providing you with contacts that have helped you find employment .....                 | <input type="checkbox"/> <sup>1</sup> | <input type="checkbox"/> <sup>2</sup> | <input type="checkbox"/> <sup>3</sup> | <input type="checkbox"/> <sup>4</sup> | <input type="checkbox"/> <sup>5</sup> | <input type="checkbox"/> <sup>6</sup> |
| d. Positively influencing your ability to obtain funding for your work.....               | <input type="checkbox"/> <sup>1</sup> | <input type="checkbox"/> <sup>2</sup> | <input type="checkbox"/> <sup>3</sup> | <input type="checkbox"/> <sup>4</sup> | <input type="checkbox"/> <sup>5</sup> | <input type="checkbox"/> <sup>6</sup> |
| e. Helping you achieve your career goals.....                                             | <input type="checkbox"/> <sup>1</sup> | <input type="checkbox"/> <sup>2</sup> | <input type="checkbox"/> <sup>3</sup> | <input type="checkbox"/> <sup>4</sup> | <input type="checkbox"/> <sup>5</sup> | <input type="checkbox"/> <sup>6</sup> |
| f. Influencing the specific direction of your current research.....                       | <input type="checkbox"/> <sup>1</sup> | <input type="checkbox"/> <sup>2</sup> | <input type="checkbox"/> <sup>3</sup> | <input type="checkbox"/> <sup>4</sup> | <input type="checkbox"/> <sup>5</sup> | <input type="checkbox"/> <sup>6</sup> |
| g. Influencing the progress of your current research .....                                | <input type="checkbox"/> <sup>1</sup> | <input type="checkbox"/> <sup>2</sup> | <input type="checkbox"/> <sup>3</sup> | <input type="checkbox"/> <sup>4</sup> | <input type="checkbox"/> <sup>5</sup> | <input type="checkbox"/> <sup>6</sup> |

31. Looking back on your career thus far, would you make the same decision to participate in the Cancer Prevention Fellowship Program?

Yes..... <sup>1</sup>  
 No..... <sup>2</sup>

32. Have you ever encouraged someone else to apply for the Cancer Prevention Fellowship Program?

Yes..... <sup>1</sup>  
 No..... <sup>2</sup>

**REFLECTIONS AND RECOMMENDATIONS**

**This section asks a few open-ended questions about significant accomplishments in your career, your opinion about the most valuable aspect of the program, and your recommendations for program improvements.**

33. What do you consider to be the two or three most important accomplishments in your career?

34. What was the single most valuable aspect of the Cancer Prevention Fellowship Program to you?

35. What is the single most important improvement you would like made in the Cancer Prevention Fellowship Program?

36. If you could make other improvements to the Cancer Prevention Fellowship Program, what would they be?

**DEMOGRAPHICS**

**The last section of the survey asks about demographic information, including your education.**

37. What is your gender?

- Male ..... <sup>1</sup>
- Female..... <sup>2</sup>

38. Are you Hispanic/Latino?

- No, not Hispanic/Latino..... <sup>1</sup>
- Yes, Hispanic/Latino..... <sup>2</sup>

39. What is your race? *(Please select all that apply.)*

- American Indian or Alaska Native..... <sup>1</sup>
- Asian ..... <sup>2</sup>
- Black or African American ..... <sup>3</sup>
- Native Hawaiian or Other Pacific Islander.. ..... <sup>4</sup>
- White..... <sup>5</sup>

40. What is your birth year?

41. Which of the following doctoral degrees have you received and in what year did you receive them? *(Please select all that apply.)*

|                                      |                             | <b>Year of most recent degree</b> |
|--------------------------------------|-----------------------------|-----------------------------------|
| PhD.....                             | <input type="checkbox"/> 1  | _____                             |
| ScD.....                             | <input type="checkbox"/> 2  | _____                             |
| MD.....                              | <input type="checkbox"/> 3  | _____                             |
| DO.....                              | <input type="checkbox"/> 4  | _____                             |
| DrPH.....                            | <input type="checkbox"/> 5  | _____                             |
| DDS.....                             | <input type="checkbox"/> 6  | _____                             |
| DMD.....                             | <input type="checkbox"/> 7  | _____                             |
| JD.....                              | <input type="checkbox"/> 8  | _____                             |
| DVM.....                             | <input type="checkbox"/> 9  | _____                             |
| Other <i>(Please specify.)</i> _____ | <input type="checkbox"/> 10 | _____                             |

42. Which of the following other degrees or certifications do you have?

|                                      |                            |
|--------------------------------------|----------------------------|
| MS.....                              | <input type="checkbox"/> 1 |
| MA.....                              | <input type="checkbox"/> 2 |
| MPH.....                             | <input type="checkbox"/> 3 |
| MBA.....                             | <input type="checkbox"/> 4 |
| NP.....                              | <input type="checkbox"/> 5 |
| RD.....                              | <input type="checkbox"/> 6 |
| RN.....                              | <input type="checkbox"/> 7 |
| Other <i>(Please specify.)</i> _____ | <input type="checkbox"/> 8 |
